# Supplementary material
Source: ML conference proceedings conference paper supplement (https://openreview.net/forum?id=ni-a2z3tq0)

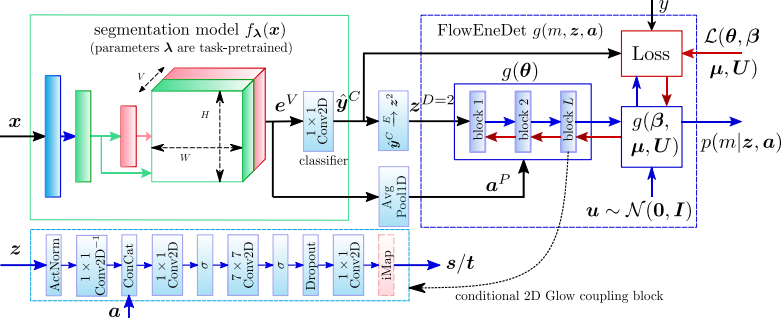

Supplement: supplementary_material [file attachment]

FS L&amp;F

Image

Det Ground Truth

FED-U DL-R101

FED-U SF-B2

FED-C SF-B2

FED-C TTA SF-B2

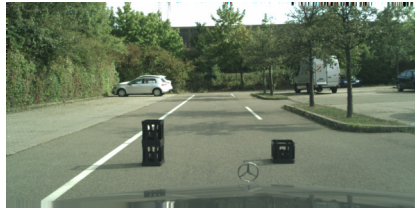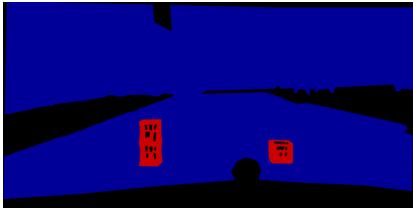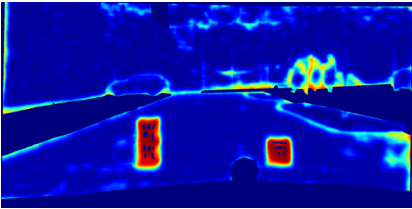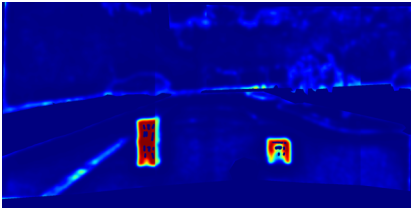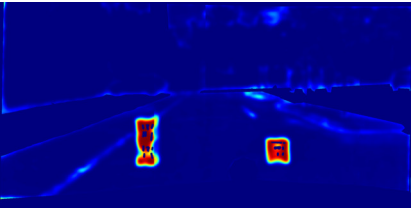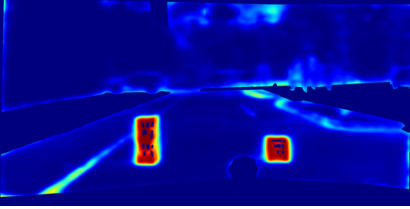

FS Static

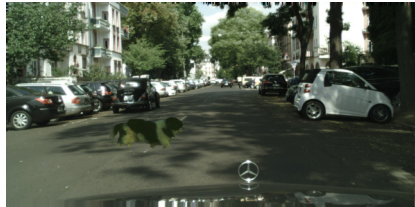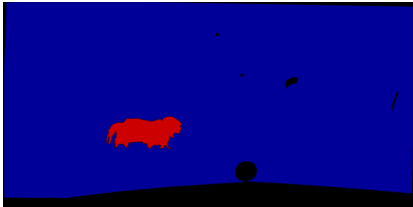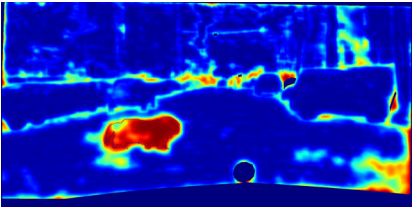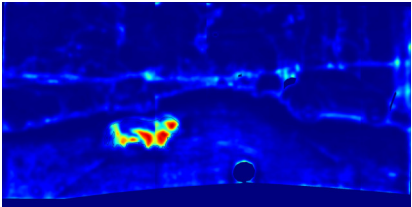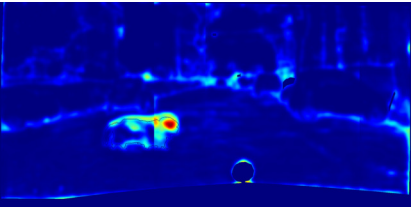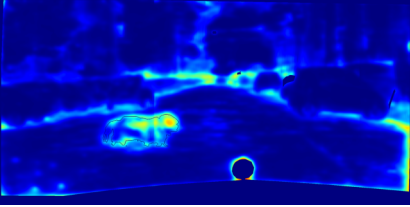

Supplement: supplementary_material [file attachment]

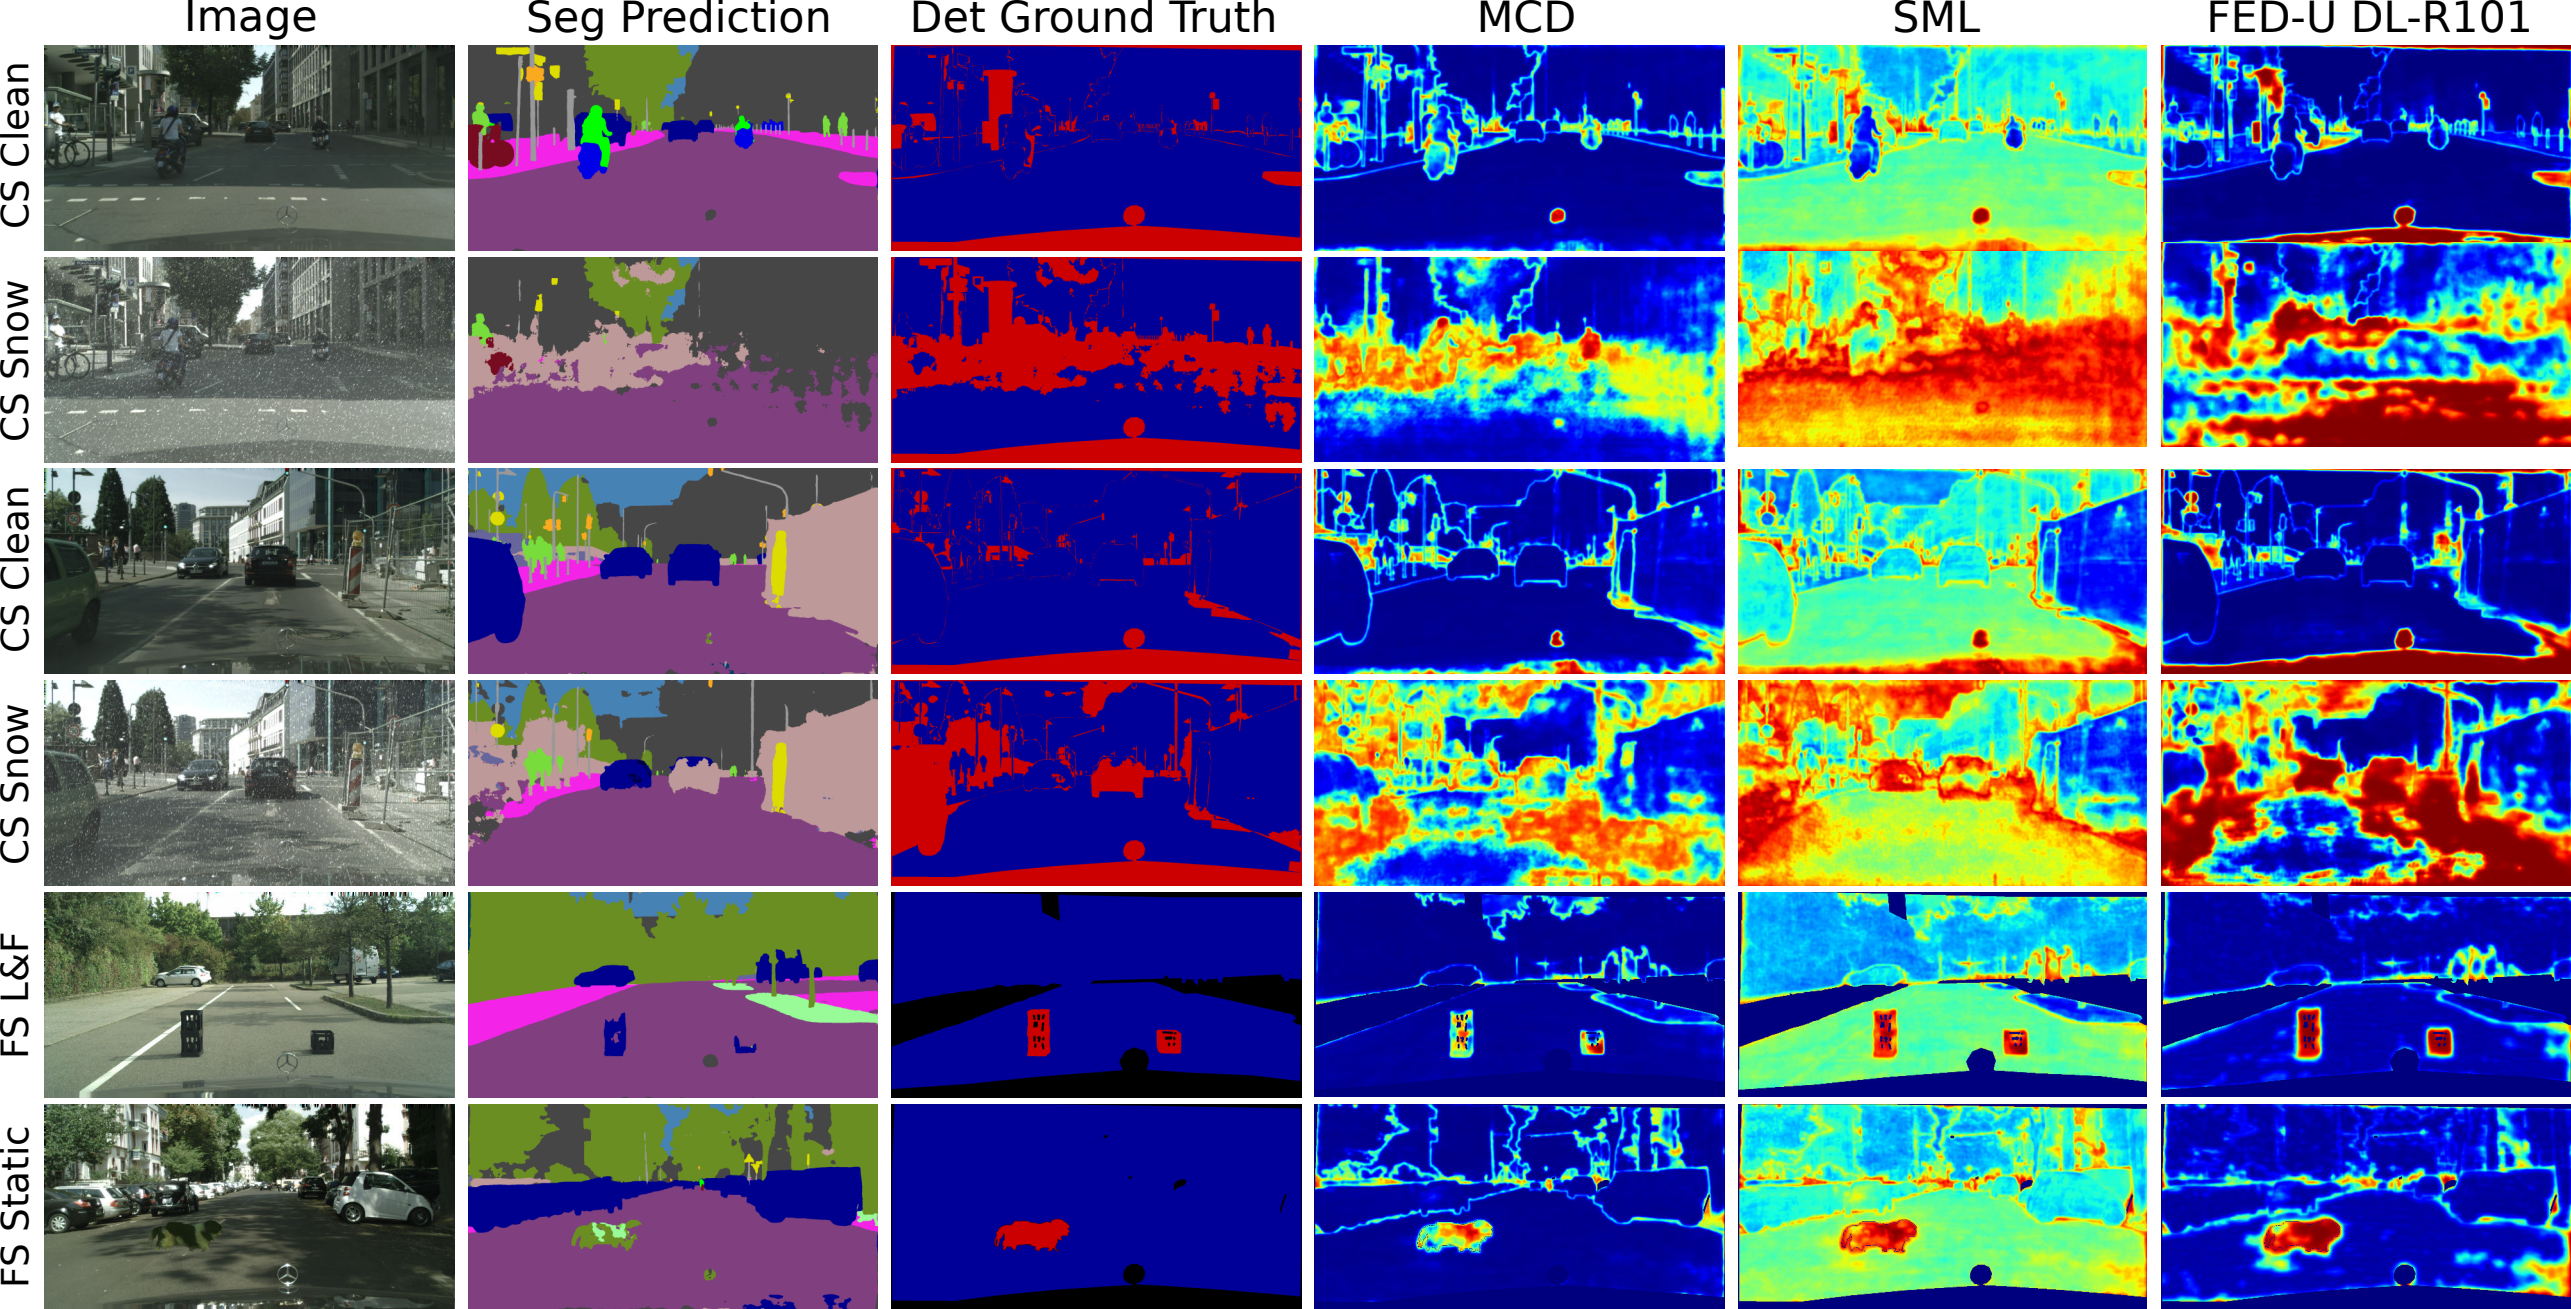

Supplement: supplementary_material [file attachment]

discriminative classifier  $\hat{y} = \arg \max f_{\lambda}(x)$

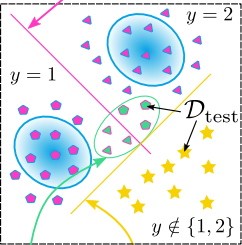

IDM and OOD detectors

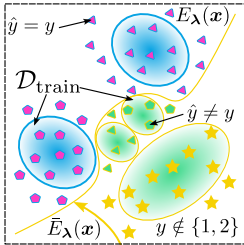

our FlowEneDet model

Supplement: supplementary_material [file attachment]
